# Supplementary material for: Strong direct-bandgap photoluminescence of suspended few-layer MoS 2 via interlayer decoupling
Source: Royal Society of Chemistry journal article supplement (doi:10.1039/d5nr03582a), 2025-11-26
Supplement: d5nr03582a1.pdf [file d5nr03582a1.pdf]

## Supporting Information

# Strong direct-bandgap photoluminescence of suspended few-layer MoS<sub>2</sub> via interlayer decoupling

*Jiahao Wu<sup>1</sup>, Jinyan Huang<sup>2</sup>, Juncong She<sup>1,\*</sup>, and Shasha Li<sup>2,\*</sup>*

<sup>1</sup>State Key Laboratory of Optoelectronic Materials and Technologies, Guangdong  
Province Key Laboratory of Display Material and Technology, School of Electronics  
and Information Technology, Sun Yat-sen University, Guangzhou 510275, People's  
Republic of China

<sup>2</sup>School of Integrated Circuits, Sun Yat-sen University, Shenzhen 518107, People's  
Republic of China

\*Email: lishsh89@mail.sysu.edu.cn; shejc@mail.sysu.edu.cn

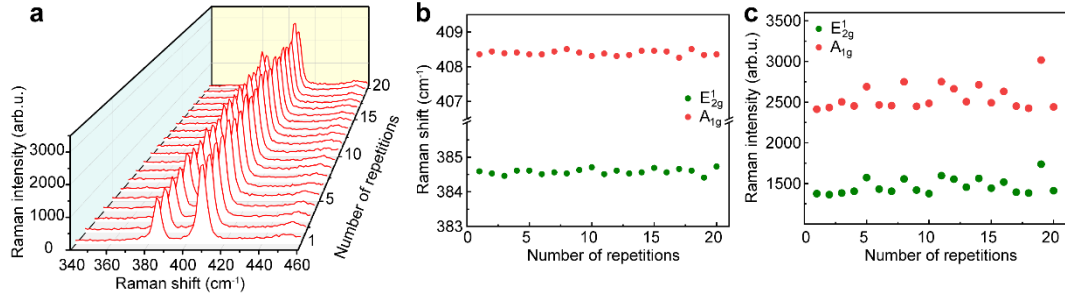

**Figure S1.** Raman measurements of MoS<sub>2</sub>. (a) Raman spectra of MoS<sub>2</sub> obtained with a laser power of 6  $\mu$ W. The exposure time of each measurement is 10 s. (b) Raman shifts of the E<sub>12g</sub> and A<sub>1g</sub> peaks. (c) Raman intensities of the E<sub>12g</sub> and A<sub>1g</sub> peaks. It can be seen that the Raman measurements maintain good repeatability over multiple measurements. The results suggest that the structural quality of the tested MoS<sub>2</sub> samples can be well maintained after the optical measurements with such a low power.

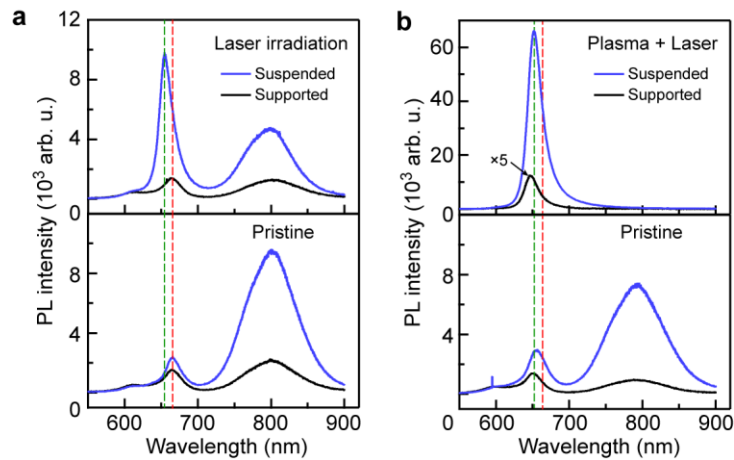

**Figure S2.** Enhanced radiative emission of A excitons. (a) PL spectra from both suspended and supported regions of MoS<sub>2</sub> before (bottom) and after (top) laser irradiation. (b) PL spectra from MoS<sub>2</sub> before (bottom) and after (top) the combined plasma and laser treatment. The green and red dashed line indicate the positions of A excitons (~654 nm) and trions (~663 nm) extracted from Gaussian fitting. The as-

prepared MoS<sub>2</sub> flake for laser treatment was highly n-doped, which dominated the emission spectrum and made the A exciton peak nearly indistinguishable. Following laser irradiation, a pronounced enhancement of the A exciton emission was observed, indicating a significant reduction in electron doping. A similar enhancement, accompanied by the complete suppression of indirect bandgap emission, was also achieved with the combined plasma and laser treatment.

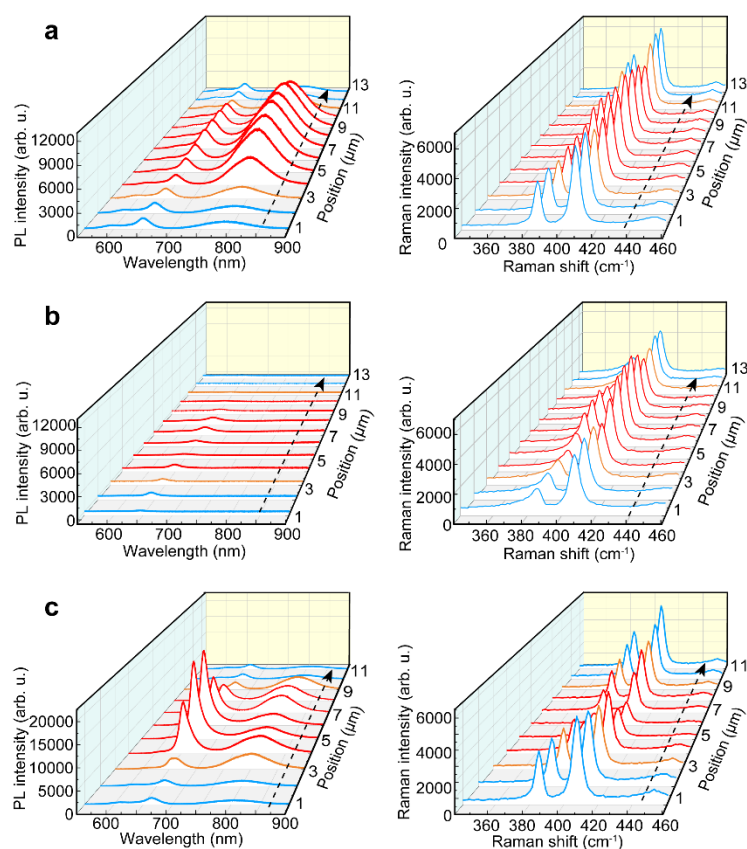

**Figure S3.** Optical characterizations. (a–c) PL and Raman spectra of the pristine bilayer MoS<sub>2</sub> (a), plasma-treated bilayer MoS<sub>2</sub> (b), and laser-treated bilayer MoS<sub>2</sub> (c). The PL and Raman spectra are shown in the left and right panels, respectively.

Table S1 Average values and standard deviations of Raman peak frequencies and their difference for different types of MoS<sub>2</sub> samples.

| MoS <sub>2</sub> sample | $\omega_E$ (cm <sup>-1</sup> ) | $\omega_A$ (cm <sup>-1</sup> ) | $\Delta\omega$ (cm <sup>-1</sup> ) |
|-------------------------|--------------------------------|--------------------------------|------------------------------------|
| Pristine 1L             | 385.94 $\pm$ 0.14              | 405.91 $\pm$ 0.05              | 19.97 $\pm$ 0.28                   |
| Pristine sus 1L         | 385.99 $\pm$ 0.24              | 405.98 $\pm$ 0.20              | 19.99 $\pm$ 0.18                   |
| Pristine 2L             | 385.63 $\pm$ 0.11              | 407.89 $\pm$ 0.04              | 22.26 $\pm$ 0.13                   |
| Pristine sus 2L         | 385.28 $\pm$ 0.03              | 407.67 $\pm$ 0.05              | 22.39 $\pm$ 0.04                   |
| Plasma 2L               | 385.61 $\pm$ 0.13              | 407.65 $\pm$ 0.05              | 22.04 $\pm$ 0.15                   |
| Plasma sus 2L           | 384.98 $\pm$ 0.16              | 407.37 $\pm$ 0.10              | 22.39 $\pm$ 0.12                   |
| Laser 2L                | 385.64 $\pm$ 0.07              | 407.94 $\pm$ 0.07              | 22.3 $\pm$ 0.10                    |
| Laser sus 2L            | 385.40 $\pm$ 0.19              | 407.88 $\pm$ 0.10              | 22.48 $\pm$ 0.20                   |
| (Plasma + laser) 2L     | 385.94 $\pm$ 0.14              | 408.06 $\pm$ 0.05              | 22.12 $\pm$ 0.16                   |
| (Plasma + laser) sus 2L | 386.20 $\pm$ 0.24              | 406.66 $\pm$ 0.20              | 20.46 $\pm$ 0.34                   |

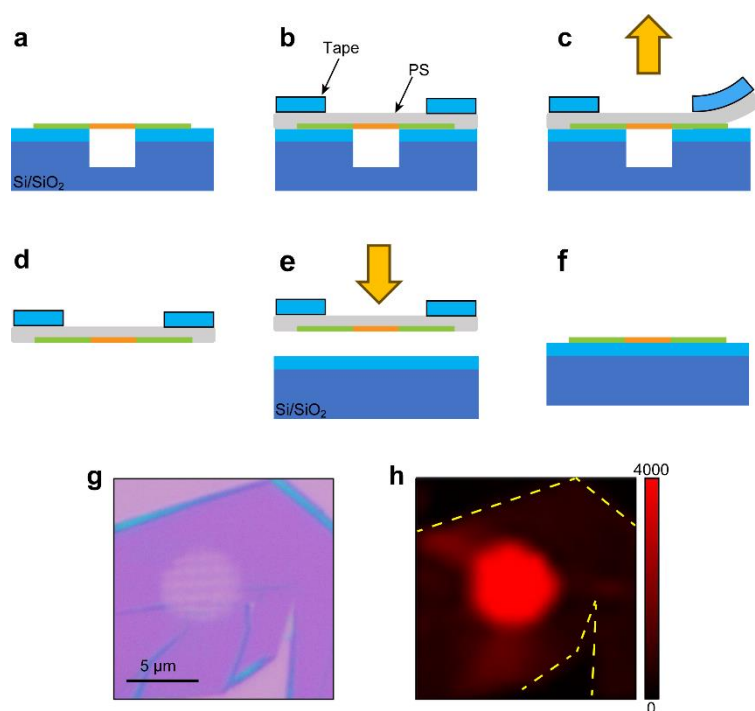

**Figure S4** Transfer process. (a) The treated MoS<sub>2</sub> sample on the Si/SiO<sub>2</sub> substrate with micro-holes. (b) The MoS<sub>2</sub> sample was spin-coated with the polystyrene (PS) solution, forming a PS film after drying in air. (c) The PS film was exfoliated by tape with the MoS<sub>2</sub> sample attached on the PS film. (d–f) The PS film was transferred to a bare

Si/SiO<sub>2</sub> substrate and removed by toluene solution, leaving the MoS<sub>2</sub> sample on the substrate. (g,h) Optical microscopy (g) and PL mapping (h) images of the treated MoS<sub>2</sub> transferred from the hole region to a bare Si/SiO<sub>2</sub> substrate.

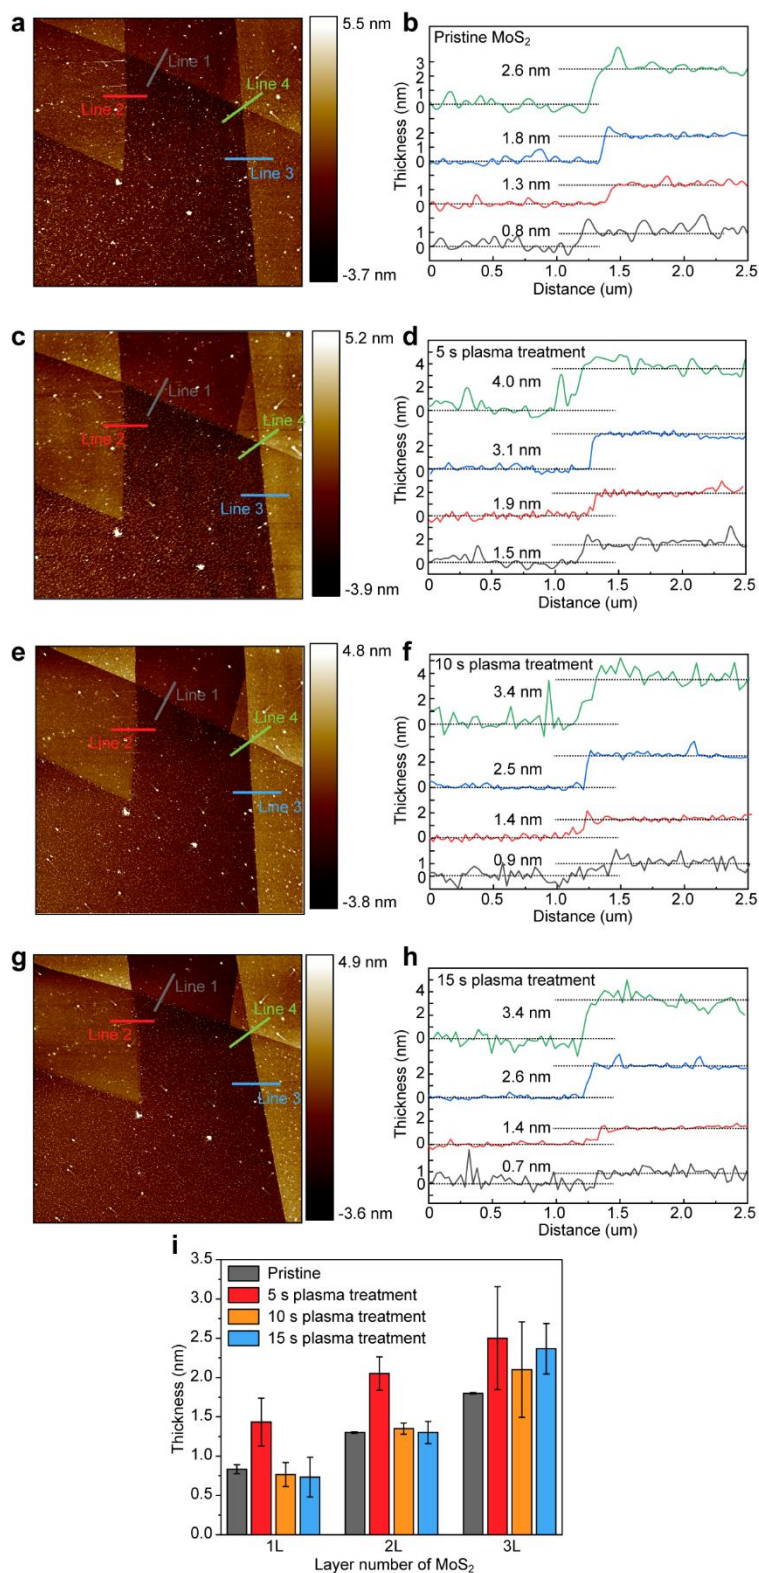

**Figure S5** AFM characterization of plasma-treated MoS<sub>2</sub>. (a,b) AFM image (a) of the pristine MoS<sub>2</sub> and height profiles (b) along the lines in (a). (c–h) AFM images and corresponding height profiles obtained from the MoS<sub>2</sub> samples after plasma treatments for 5 s (c,d), 10 s (e,f), and 15 s (g,h). (i) Histogram summarizing the thickness variations of the MoS<sub>2</sub> samples after plasma treatments.

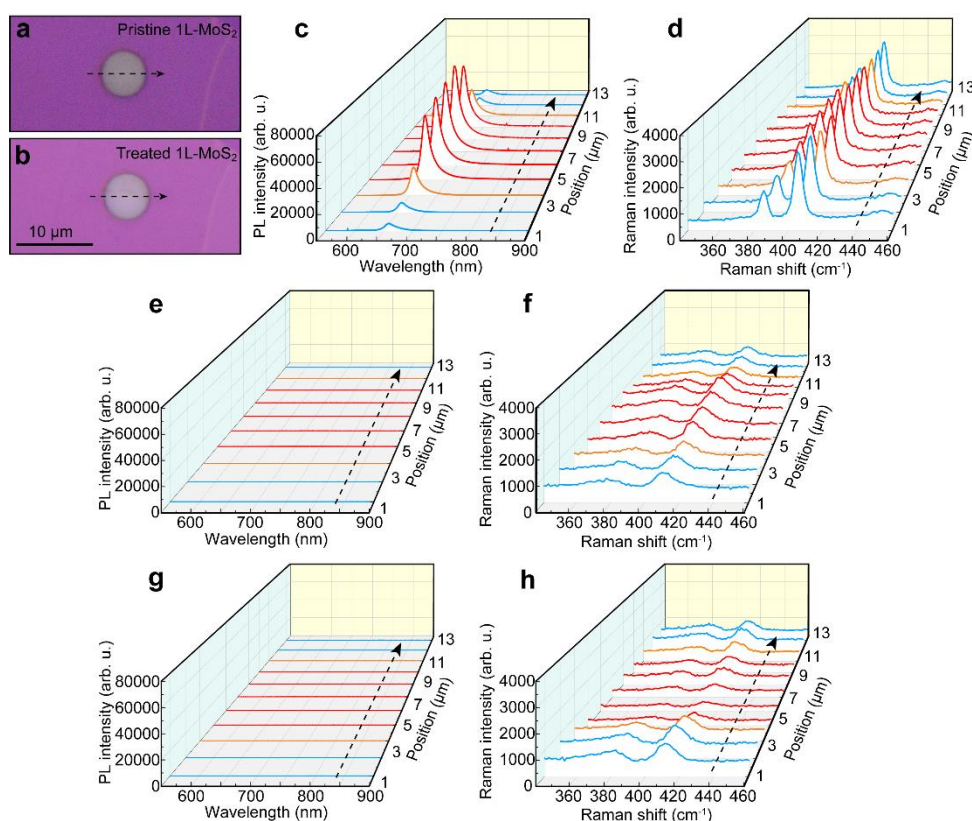

**Figure S6** Optical characterizations on the monolayer MoS<sub>2</sub>. (a, b) Optical microscopy images of monolayer MoS<sub>2</sub> before (a) and after (b) the plasma and laser treatments. (c, d) PL (c) and Raman (d) spectra of the pristine monolayer MoS<sub>2</sub> sample. The PL emission of suspended monolayer MoS<sub>2</sub> is significantly stronger than that of the supported one, which is consistent with other studies.<sup>1,2</sup> The Raman spectra of pristine



monolayer MoS<sub>2</sub> show no obvious difference in the suspended and supported region. Here, Raman peaks corresponding to the A'<sub>1</sub> and E'<sub>1</sub> modes of monolayer MoS<sub>2</sub> due to D<sub>3h</sub> point group are provided.<sup>3</sup> (e, f) PL and Raman spectra of the plasma-treated monolayer MoS<sub>2</sub> sample. (g, h) PL and Raman spectra of the monolayer MoS<sub>2</sub> after plasma treatment followed by laser irradiation.

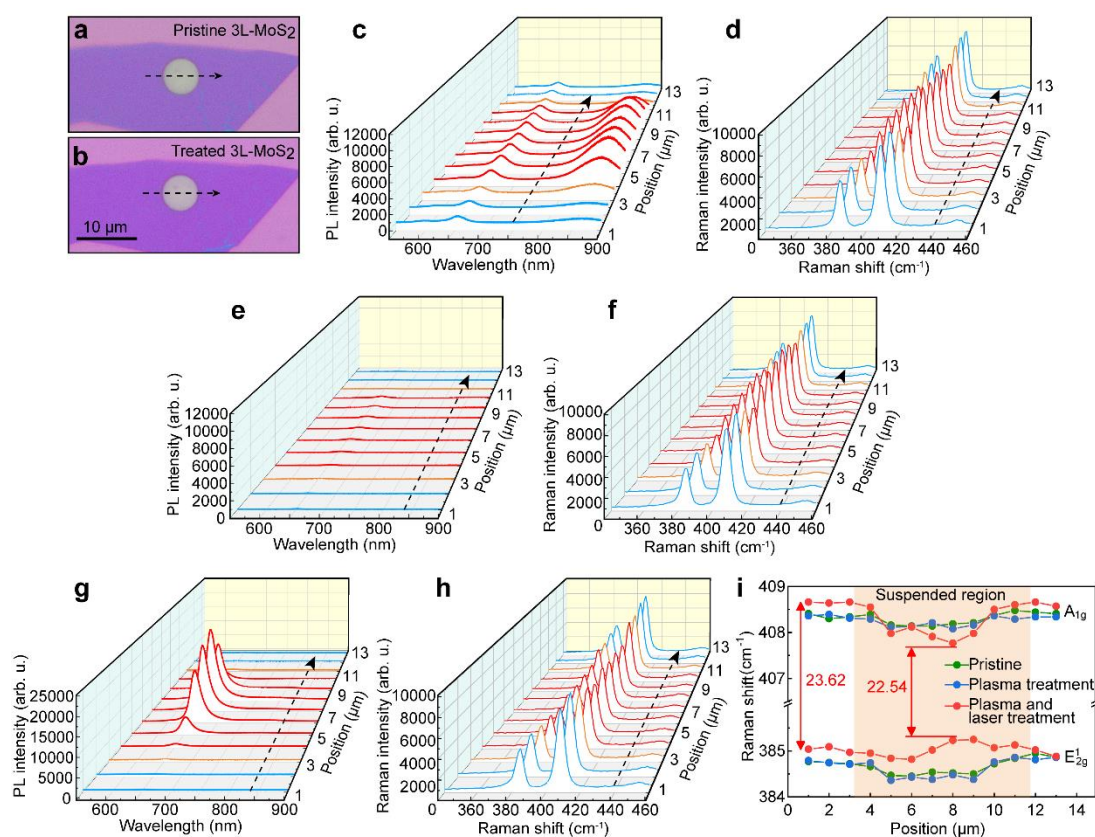

**Figure S7.** Optical characterizations on the trilayer MoS<sub>2</sub>. (a, b) Optical microscopy images of trilayer MoS<sub>2</sub> before (a) and after (b) the plasma and laser treatments. (c, d) PL (c) and Raman (d) spectra of the pristine trilayer MoS<sub>2</sub> sample. (e, f) PL and Raman spectra of the plasma-treated trilayer MoS<sub>2</sub> sample. (g, h) PL and Raman spectra of the trilayer MoS<sub>2</sub> after plasma treatment followed by laser irradiation. (i) Raman shifts of

the  $E'_1$  and  $A'_1$  modes obtained from different types of  $\text{MoS}_2$  samples. The wavenumber difference of the two dominant Raman modes decreased after the plasma and laser treatments, suggesting the emergence of interlayer decoupling.

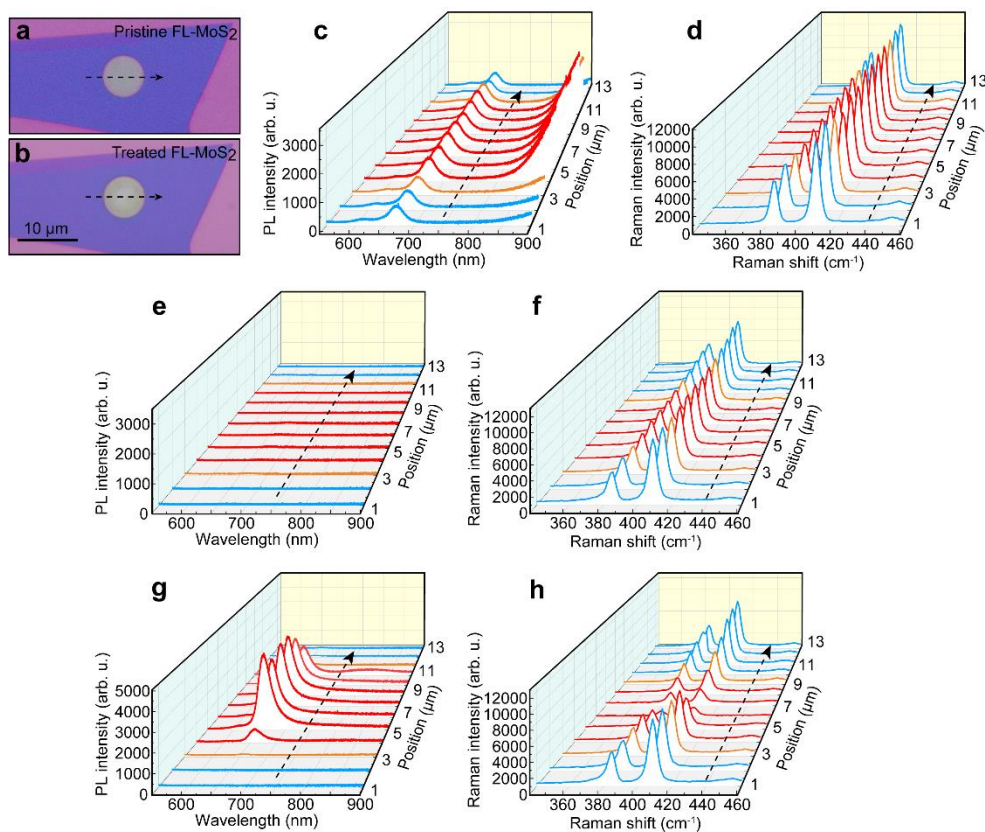

**Figure S8.** Optical characterizations on the few-layer  $\text{MoS}_2$ . (a, b) Optical microscopy images of few-layer  $\text{MoS}_2$  before (a) and after (b) the plasma and laser treatments. (c, d) PL (c) and Raman (d) spectra of the pristine few-layer  $\text{MoS}_2$  sample. (e, f) PL and Raman spectra of the plasma-treated few-layer  $\text{MoS}_2$  sample. (g, h) PL and Raman spectra of the few-layer  $\text{MoS}_2$  after plasma treatment followed by laser irradiation.



Table S2 Comparative summary of key parameters in plasma treatment and laser irradiation for PL modulation of MoS<sub>2</sub>

| Method                                      | Layer number | Processing parameters                                                                                                             | Mechanism for PL modulation                      | Enhancement factor | Ref.     |
|---------------------------------------------|--------------|-----------------------------------------------------------------------------------------------------------------------------------|--------------------------------------------------|--------------------|----------|
| O <sub>2</sub> plasma                       | 1L           | RF power: 5 W; Pressure: 37.5 mTorr                                                                                               | Healing of sulfur vacancies                      | ~10                | 4        |
| O <sub>2</sub> plasma                       | 1L           | RF power: 100 W; Pressure: 250 mTorr                                                                                              | Oxidation                                        | quenching          | 5        |
| O <sub>2</sub> plasma                       | Few-layer    | RF power: 20 W; Pressure: 200 mTorr; Treated time: 3 min                                                                          | Layer decoupling due to ion intercalation        | ~16                | 6        |
| O <sub>2</sub> plasma                       | Few-layer    | RF power: ~15 W; Pressure: 400 mTorr; Treated time: 3 min; DC bias: 15–20 V                                                       | Layer decoupling due to ion intercalation        | ~20 (4L)           | 7        |
| O <sub>2</sub> plasma                       | Few-layer    | RF power: 180 W; Treated time: 10 s                                                                                               | Shielding from a surface oxide layer             | ~3 (3L)            | 8        |
| O <sub>2</sub> plasma                       | Few-layer    | RF power: 5~30 W; Pressure: 285 mTorr; Treated time: 2 min                                                                        | Layer decoupling due to ion intercalation        | ~20 (2L)           | 9        |
| O <sub>2</sub> plasma                       | Few-layer    | Plasma power: 40 W; Pressure: 1 Pa; treated time: 2–60 s                                                                          | Oxidation and etching                            | quenching          | 10       |
| O <sub>2</sub> /Ar plasma                   | multilayer   | Oxygen: Ar = 3:1; Pressure: ~5 mbar; Treated time: 14 s                                                                           | Layer decoupling due to ion intercalation        | ~1.2 (4L)          | 11       |
| Laser irradiation                           | 1L           | Power intensity: $4.5 \times 10^5$ W/cm <sup>2</sup> ; Wavelength: 514.5 nm, Treated time: 10 s to 25 min                         | Healing of sulfur vacancies                      | ~5.5               | 12       |
| Laser irradiation                           | 1L           | Power: 50 mW; Wavelength: 532 nm; Treated time: 10 s to 15 min; Under pure oxygen atmosphere                                      | Healing of sulfur vacancies                      | 3.8                | 13       |
| Laser irradiation                           | 1L           | Power intensity: $5.8 \times 10^5$ W/cm <sup>2</sup> ; Wavelength: 532 nm; Treated time: 10 s to 25 min                           | Healing of sulfur vacancies                      | ~2                 | 14       |
| Laser irradiation                           | Multi-layer  | Power: 10–17mW; Wavelength: 532 nm; Treated time: 10 s to 15 min; Under pure oxygen atmosphere                                    | Etching                                          | /                  | 15       |
| Laser irradiation                           | Few-layer    | Power: 10–40 mW; Wavelength: 532 nm; Treated time: 60 s                                                                           | Etching and shielding from a surface oxide layer | ~3 (4L)            | 16       |
| O <sub>2</sub> plasma and laser irradiation | Few-layer    | RF power: 5 W; Pressure: 37.5 mTorr; DC bias: 70-120 V; plasma treated time: 5 s;<br>Laser power: ~460 $\mu$ W; Treated time: 1 s | Layer decoupling                                 | ~30                | Our work |

## References

1. Y. Huang, Y. K. Wang, H. Xin-Yu, G. H. Zhang, X. Han, Y. Yang, Y. Gao, L. Meng, Y. Wang, G. Z. Geng, L. W. Liu, L. Zhao, Z. H. Cheng, X. F. Liu, Z. F. Ren, H. X. Yang, Y. Hao, H. J. Gao, X. J. Zhou, W. Ji and Y. L. Wang, *InfoMat.*, 2021, **4**, 1–13.
2. H. Shi, R. Yan, S. Bertolazzi, J. Brivio, B. Gao, A. Kis, D. Jena, H. G. Xing and L. Huang, *ACS Nano*, 2013, **7**, 1072–1080.
3. Y. A. Romaniuk, S. Golovynskyi, A. P. Litvinchuk, D. Dong, Y. Lin, O. I. Datsenko, M. Bosi, L. Seravalli, I. S. Babichuk, V. O. Yukhymchuk, B. Li and J. Qu, *Physica E*, 2022, **136**, 114999.
4. H. Nan, Z. Wang, W. Wang, Z. Liang, Y. Lu, Q. Chen, D. He, P. Tan, F. Miao, X. Wang, J. Wang and Z. Ni, *ACS Nano*, 2014, **8**, 5738–5745.
5. N. Kang, H. P. Paudel, M. N. Leuenberger, L. Tetard and S. I. Khondaker, *J. Phys. Chem. C*, 2014, **118**, 21258–21263.
6. R. Dhall, M. R. Neupane, D. Wickramaratne, M. Mecklenburg, Z. Li, C. Moore, R. K. Lake and S. Cronin, *Adv. Mater.*, 2015, **27**, 1573–1578.
7. J. Wu, S. Li, X. Wang, Y. Huang, Y. Huang, H. Chen, J. Chen, J. She and S. Deng, *ACS Appl. Mater. Interfaces*, 2023, **15**, 58556–58565.
8. C. Pei, X. Li, H. Fan, J. Wang, H. You, P. Yang, C. Wei, S. Wang, X. Shen and H. Li, *ACS Appl. Nano Mater.*, 2020, **3**, 4218–4230.
9. L. Zhang, H. Nan, X. Zhang, Q. Liang, A. Du, Z. Ni, X. Gu, K. K. Ostrikov and S. Xiao, *Nat. Commun.*, 2020, **11**, 5960.
10. Y. Zhang, J. Liu, Y. Pan, K. Luo, J. Yu, Y. Zhang, K. Jia, H. Yin, H. Zhu, H. Tian and Z. Wu, *J. Mater. Sci.: Mater. Electron.*, 2019, **30**, 18185–18190.
11. J. Jadwiszczak, C. O'Callaghan, Y. Zhou, D. S. Fox, E. Weitz, D. Keane, C. P. Cullen, I. O'Reilly, C. Downing, A. Shmeliov, P. Maguire, J. J. Gough, C. McGuinness, M. S. Ferreira, A. L. Bradley, J. J. Boland, G. S. Duesberg, V. Nicolosi and H. Zhang, *Sci. Adv.*, 2018, **4**, eaao5031.
12. A. Bera, D. V. S. Muthu and A. K. Sood, *J. Raman Spectrosc.*, 2018, **49**, 100–105.
13. C. Hou, J. Deng, J. Guan, Q. Yang, Z. Yu, Y. Lu, Z. Xu, Z. Yao and J. Zheng, *Phys. Chem.*

*Chem. Phys.*, 2021, **23**, 24579–24588.

14. H. M. Oh, G. H. Han, H. Kim, J. J. Bae, M. S. Jeong and Y. H. Lee, *ACS Nano*, 2016, **10**, 5230–5236.
15. A. Castellanos-Gomez, M. Barkelid, A. M. Goossens, V. E. Calado, H. S. van der Zant and G. A. Steele, *Nano Lett.*, 2012, **12**, 3187–3192.
16. J. Lu, J. H. Lu, H. Liu, B. Liu, K. X. Chan, J. Lin, W. Chen, K. P. Loh and C. H. Sow, *ACS Nano*, 2014, **8**, 6334–6343.
